# Supplementary material
Source: Springer Nature journal article supplement (https://www.springermedizin.de/resource/supplementary/12963_2006_50_MOESM4_ESM.pdf/9572530)

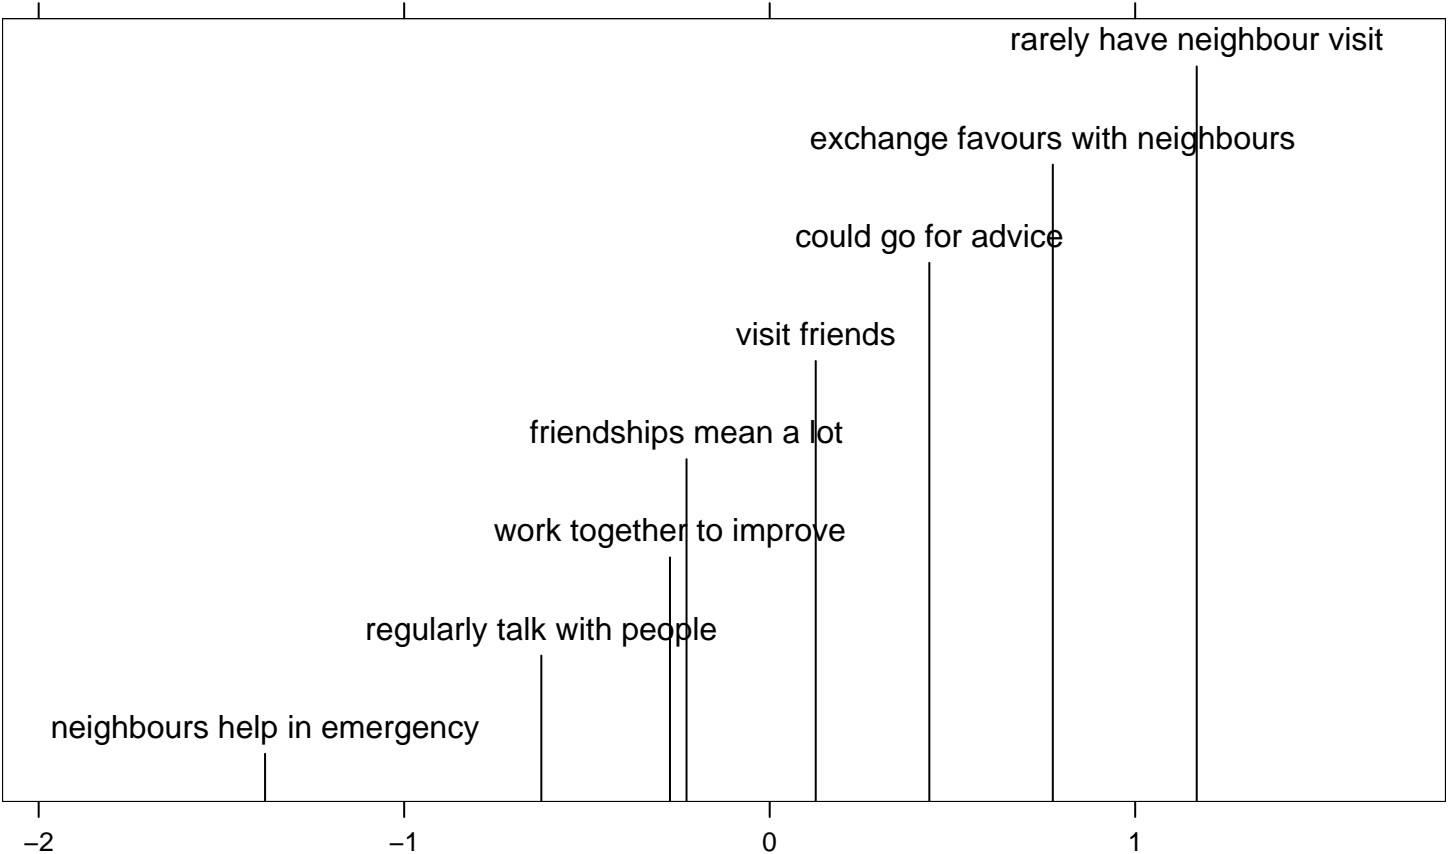

Supplement: MOESM4 [file 9572530]
